# Supplementary material
Source: PubMed Central journal article supplement (PMC3594259)
Supplement: cc-12-587-s01.pdf [file cc-12-587-s01.pdf]

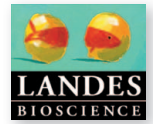

## **Supplemental Material to:**

**Lisa Postow and Hironori Funabiki**

**An SCF complex containing Fbxl12 mediates DNA  
damage-induced Ku80 ubiquitylation**

**2013; 12(4)**

**<http://dx.doi.org/10.4161/cc.23408>**

**<http://www.landesbioscience.com/journals/cc/article/23408/>**

## Supplementary Figure 1

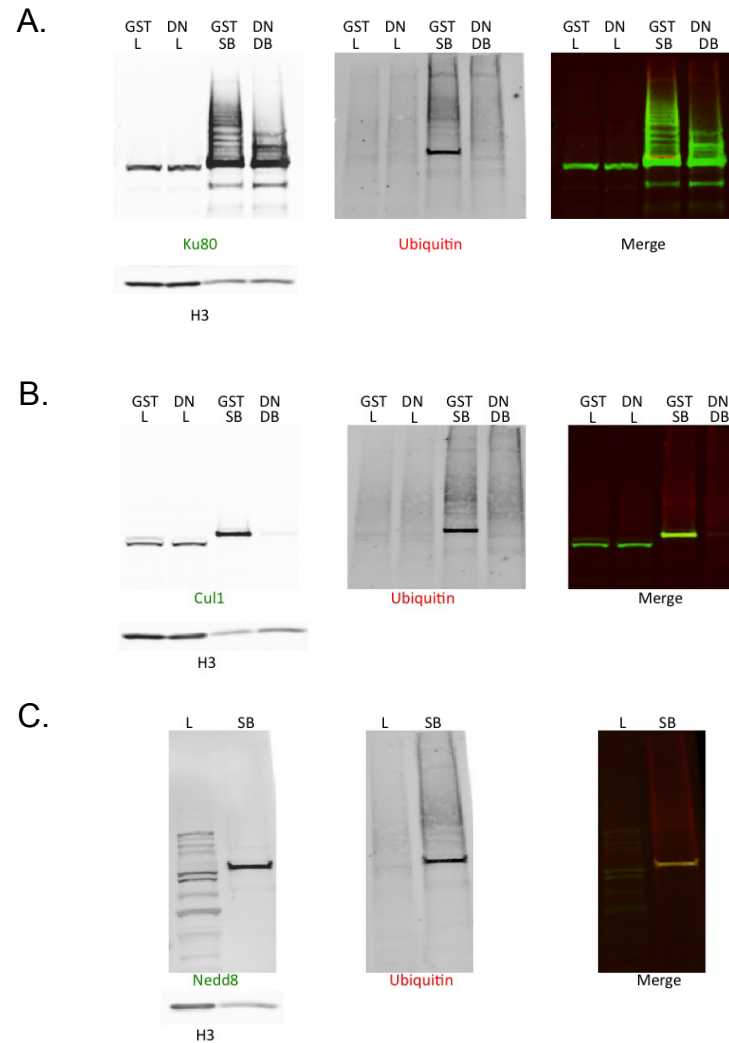

**Figure S1. Cul1 is neddylated on DNA beads.** SB- and DB-DNA beads were incubated in extract containing GST as a control or GST-DN-Cul (DN), and proteins co-isolating with DNA beads were probed by immunoblot. The images of two antibodies with distinct infra-red labels were merged using an Odyssey imaging system and the LI-COR software. **A.** Anti-Ku80 was merged with anti-ubiquitin probes on the same immunoblot, indicating that a strong anti-ubiquitin-staining band does not co-migrate with bands representing modified Ku80. **B.** In a parallel experiment, anti-Cul1 antibodies were probed with anti-ubiquitin, revealing that the strong anti-ubiquitin band does co-migrate with Cul1. **C.** This anti-ubiquitin band also co-migrates with an anti-Nedd8 band. L: load.

Supplementary Figure 2

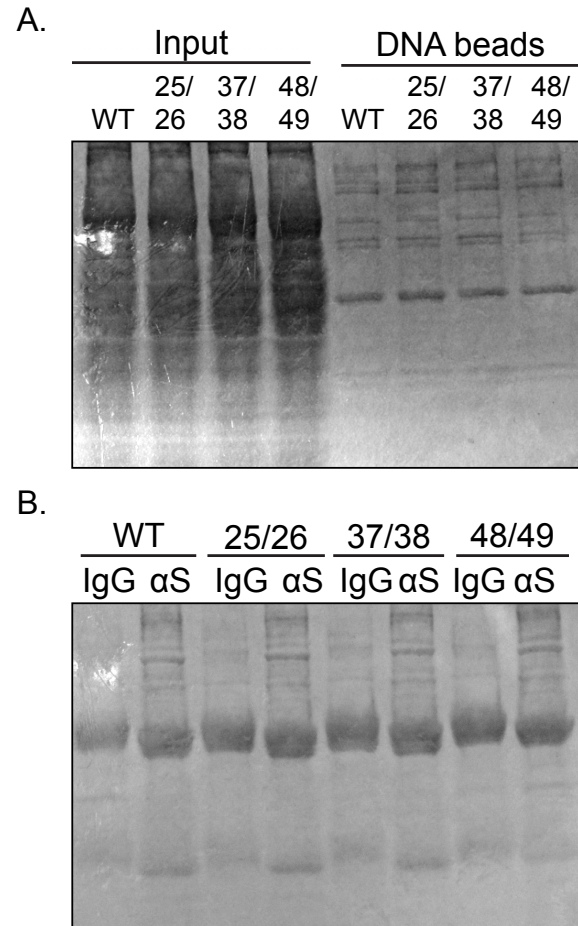

**Figure S2. Coomassie staining of Fbxl12 point mutant gels.** Coomassie staining of gels analyzed by phosphorimager in (A) Fig. 3D and (B) Fig. 3E to indicate equal loading of samples.
